# Supplementary material for: Biomethane Yield, Physicochemical Structures, and Microbial Community Characteristics of Corn Stover Pretreated by Urea Combined with Mild Temperature Hydrotherm
Source: MDPI journal article supplement (doi:10.3390/polym13132207), 2021-07-03
Supplement: s1 [file s1]

**Table S1** Characteristics of feedstock and inoculum used in this study <sup>a</sup>

| Parameter                       | Corn stover     | Inoculum        |
|---------------------------------|-----------------|-----------------|
| TS (%) <sup>b</sup>             | 93.37±0.08      | 15.98±0.03      |
| VS (%) <sup>b</sup>             | 87.69±0.05      | 7.29±0.05       |
| VS/TS (%) <sup>c</sup>          | 93.91±0.02      | 45.60±0.33      |
| TC (% TS) <sup>c</sup>          | 43.84±0.03      | 24.36±0.27      |
| TH (% TS) <sup>c</sup>          | 5.77±0.29       | 3.96±0.29       |
| TN (% TS) <sup>c</sup>          | 0.96±0.01       | 2.67±0.01       |
| TO (% TS) <sup>c</sup>          | 43.24±0.62      | ND <sup>d</sup> |
| C/N <sup>c</sup>                | 45.91±0.26      | 9.11±0.01       |
| pH                              | ND <sup>d</sup> | 7.77±0.02       |
| Ash content (% TS) <sup>c</sup> | 5.68±0.03       | 8.69±0.06       |

<sup>a</sup> Values are means ± SD (n = 3). <sup>b</sup> Content of fresh matter. <sup>c</sup> Content of dry matter. <sup>d</sup> ND: not determined.

**Table S2** PCR primer design

|          | Sequencing area       | Primer name | Primer sequence      |
|----------|-----------------------|-------------|----------------------|
| Bacteria | 338F_806R             | 338F        | ACTCCTACGGGAGGCAGCAG |
|          |                       | 806R        | GGACTACHVGGGTWTCTAAT |
| Archaea  | 524F10ext_Arch958Rmod | 524F10ext   | TGYCAGCCGCCGCGGTAA   |
|          |                       | Arch958Rmod | YCCGGCGTTGAVTCCAATT  |
